# Supplementary material for: Severe deficiency of the voltage-gated sodium channel NaV1.2 elevates neuronal excitability in adult mice
Source: PubMed Central journal article supplement — Cell Rep. Author manuscript; Available in PMC 2021 Aug 23. (PMC8382316; doi:10.1016/j.celrep.2021.109495), 2021-08-03
Supplement: NIHMS1730383-supplement-1.pdf [file NIHMS1730383-supplement-1.pdf]

**Supplemental information**

**Severe deficiency of the voltage-gated  
sodium channel Na<sub>v</sub>1.2 elevates  
neuronal excitability in adult mice**

**Jingliang Zhang, Xiaoling Chen, Muriel Eaton, Jiaxiang Wu, Zhixiong Ma, Shirong Lai, Anthony Park, Talha S. Ahmad, Zhefu Que, Ji Hea Lee, Tiange Xiao, Yuansong Li, Yujia Wang, Maria I. Olivero-Acosta, James A. Schaber, Krishna Jayant, Chongli Yuan, Zhuo Huang, Nadia A. Lanman, William C. Skarnes, and Yang Yang**

## Supplementary Figures:

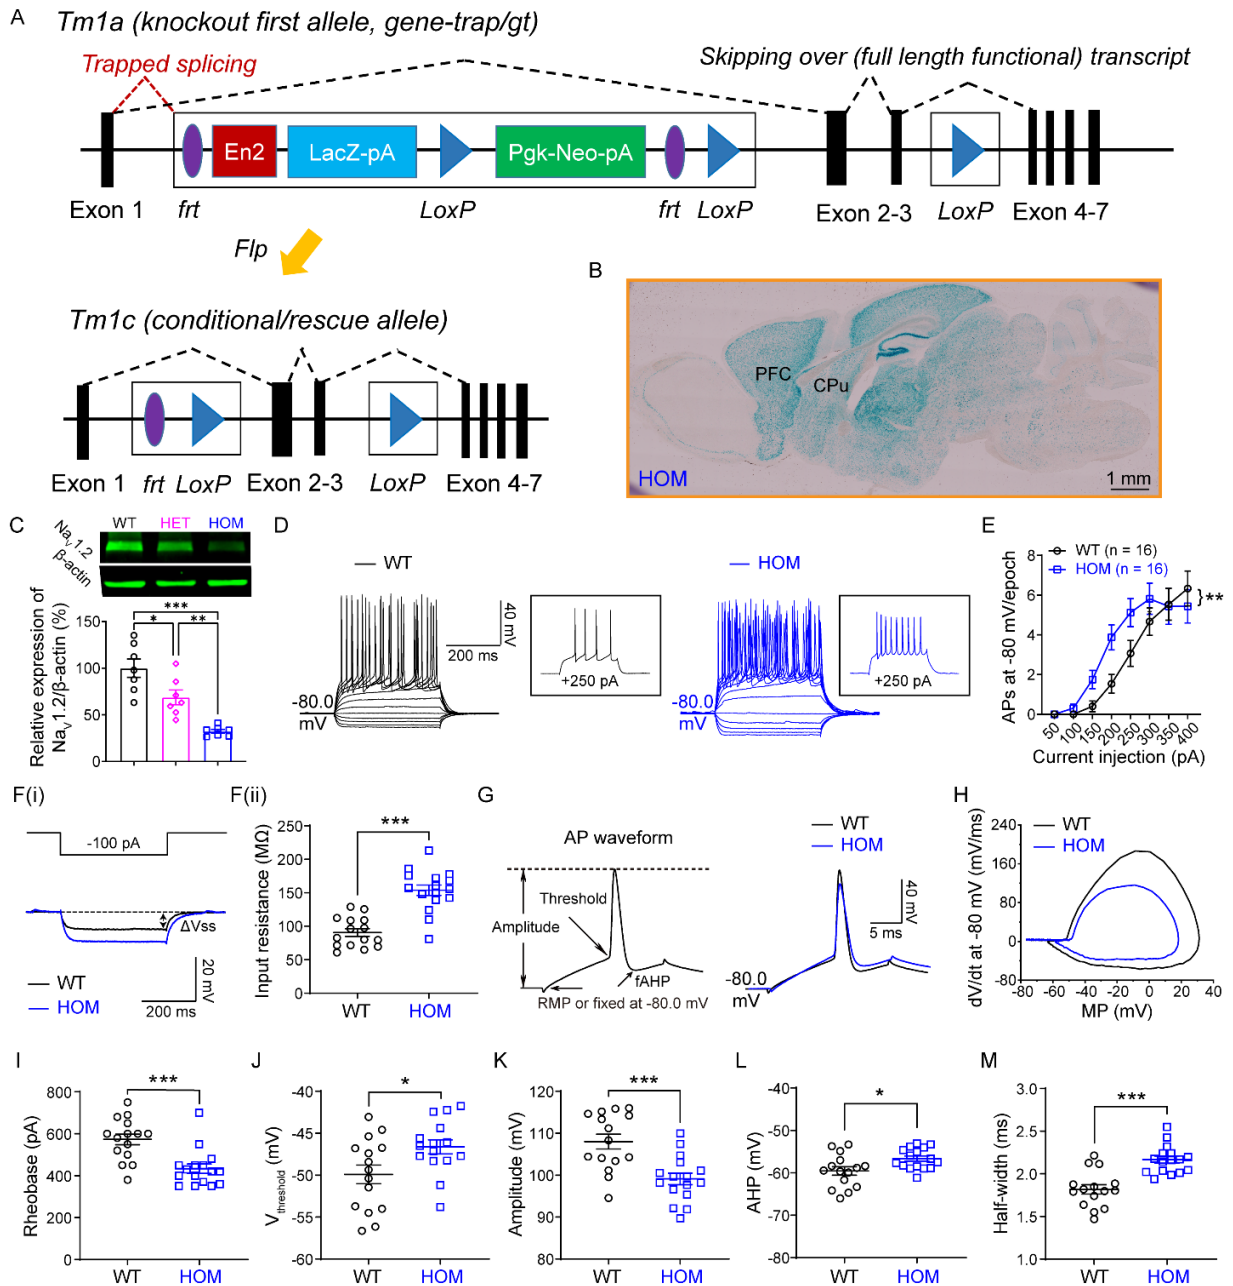

**Figure S1. Elevated neuronal firings of striatal MSNs at a fixed membrane potential of -80 mV in adult *Nav1.2*-deficient mice. Related to Figure 1.**

(A) Gene trap (gt) allele has an inserted *tm1a* trapping cassette between the Exon 1 and Exon 2 of *Scn2a* gene in the genome, which traps the transcription from Exon 1 to *tm1a* cassette, resulting in a deficiency of *Scn2a*. In the presence of Flp recombinase, *frt* sites flanked trapping cassette will be removed, producing conditional ("rescue") allele that allows the expression of

*Scn2a* like the WT. *flp*, *Flp* recognition target (purple); *En2*, engrailed-2 splice acceptor (red); *LacZ*, *lacZ*  $\beta$ -galactosidase (light blue); *LoxP*, locus of X-over P1 (dark blue); and *Neo*, neomycin (green).

**(B)** *gt* cassette contains a *LacZ* element and is driven by the native *Scn2a* promoter. Thus, the *LacZ* expression can be used as a surrogate of *Scn2a* expression. Representative *LacZ* staining of a sagittal slice from a *Scn2a<sup>gt/gt</sup>* (HOM) mouse showing a strong blue signal across the brain including the prefrontal cortex (PFC) and dorsal striatum (CPu, caudate nucleus and the putamen). Scale bar, 1 mm.

**(C)** Upper: Representative Western blots of striatal tissues from WT (black circle), HET (magenta diamond), and HOM (blue square) mice. Lower: associated quantification of  $\text{Na}_v1.2$  protein. One-way ANOVA followed by Tukey's multiple-comparison test: \* $p < 0.05$ ; \*\* $p < 0.01$ ; \*\*\* $p < 0.001$ .

**(D)** Representative current-clamp recordings of MSNs from WT (black) and HOM (blue) mice were obtained at a fixed membrane potential of -80 mV. A series of 400-ms hyperpolarizing and depolarizing steps in 50-pA increments were applied to produce the traces. Inset: representative trace in response to +250 pA current injection.

**(E)** The average number of APs generated in response to depolarizing current pulses at -80 mV. Unpaired two-tailed non-parametric Mann-Whitney *U*-test for each current pulse: \*\* $p < 0.01$ .

**(Fi)** Representative traces in response to -100 pA current injection.  $V_{\text{steady-state}}$  ( $V_{\text{ss}}$ ) is the voltage recorded at 0-10 ms before the end of the stimulus.

**(Fii)** Individuals and average input resistance values at -80 mV. Unpaired two-tailed Student's *t*-test: \*\*\* $p < 0.001$ .

**(G)** Left: plot of a typical AP showed its various phases. Right: typical spikes of MSNs from WT (black) and HOM (blue) mice were obtained at a fixed membrane potential of -80 mV.

**(H)** Associated phase-plane plots.

**(I-M)** Individuals and average spike rheobase, voltage threshold, amplitude, fast after-hyperpolarization (AHP), and half-width values. unpaired two-tailed Student's *t*-test: \* $p < 0.05$ ; \*\*\* $p < 0.001$ . Data were shown as mean  $\pm$  SEM.

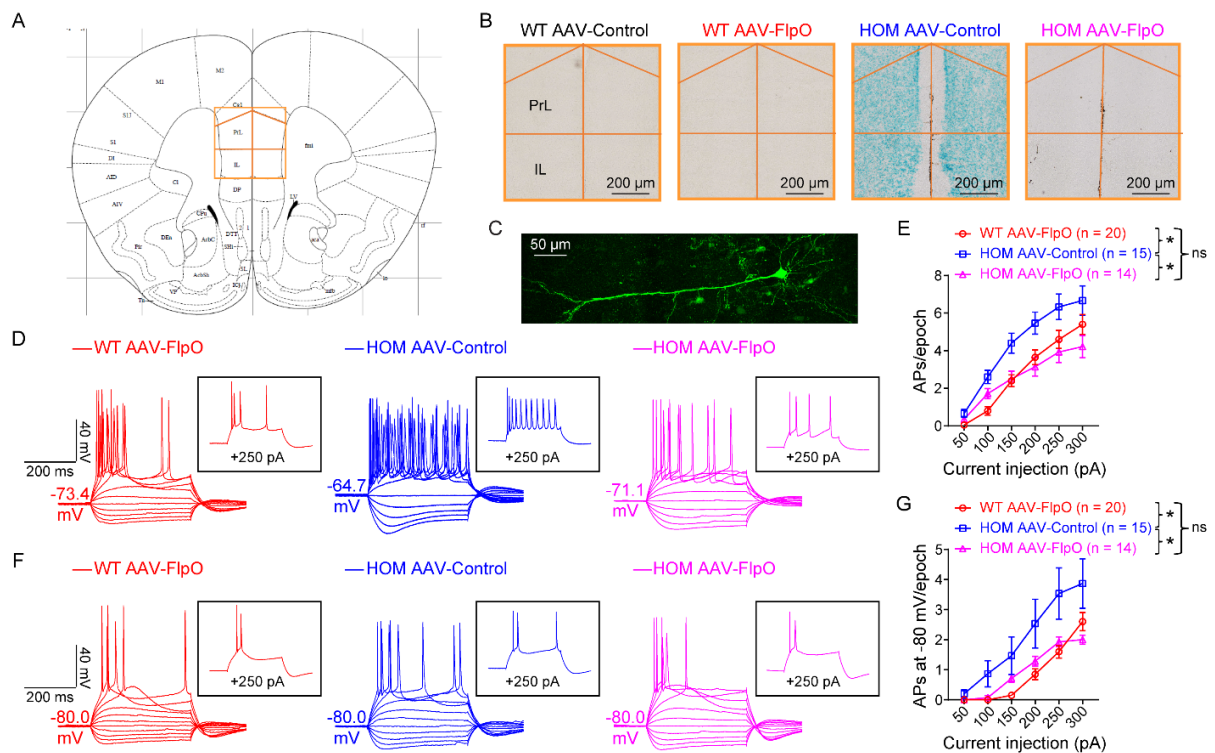

**Figure S2. Elevated neuronal firings of layer V pyramidal cells in the mPFC are reversible by FlpO-mediated rescue in adult *Nav1.2*-deficient mice. Related to Figure 2.**

(A-B) *LacZ* staining of coronal brain slices containing mPFC from WT and *Scn2a<sup>gt/gt</sup>* (HOM) mice, which were systemically administered with AAV-Control or AAV-FlpO. PrL, prelimbic cortex; IL, infralimbic cortex.

(C) A typical layer V pyramidal neuron in the mPFC was labeled by neurobiotin. Scale bar, 50  $\mu$ m.

(D) Representative current-clamp recordings of pyramidal cells from WT mice transduced with AAV-FlpO (red), HOM mice transduced with AAV-Control (blue), and HOM mice transduced with AAV-Control (magenta) at the RMP. A series of 400-ms hyperpolarizing and depolarizing steps in 50-pA increments were applied to produce the traces. Inset: representative trace in response to +250 pA current injection.

(E) The average number of APs generated in response to depolarizing current pulses at the RMP. Unpaired two-tailed non-parametric Mann-Whitney *U*-test for each current pulse: ns, no significance,  $p > 0.05$ ; \* $p < 0.05$ .

(F) Representative current-clamp recordings of layer V pyramidal cells in the mPFC from WT transduced with AAV-FlpO (red), HOM transduced with AAV-Control (blue) and HOM transduced with AAV-Control (magenta) at a fixed membrane potential of -80 mV. A series of 400-ms hyperpolarizing and depolarizing steps in 50-pA increments were applied to produce the traces. Inset: representative trace in response to +250 pA current injection.

(G) The average number of APs generated in response to depolarizing current pulses at -80 mV. Unpaired two-tailed non-parametric Mann-Whitney *U*-test for each current pulse: ns, no significance,  $p > 0.05$ ; \* $p < 0.05$ . Data were shown as mean  $\pm$  SEM.

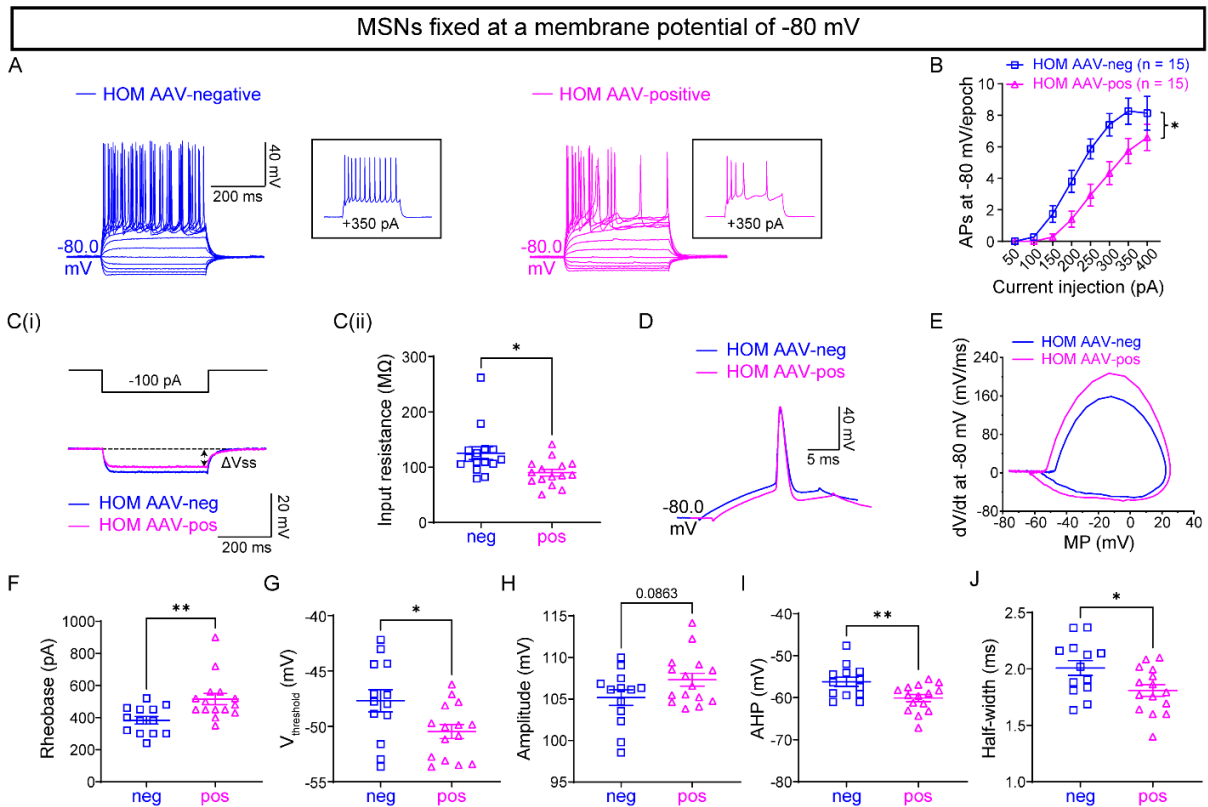

**Figure S3. Ex vivo recordings of MSNs at a fixed membrane potential of -80 mV in adult *Nav1.2*-deficient mice with a dilute AAV-FlpO-mCherry injection. Related to Figure 3.**

(A) Representative current-clamp recordings of MSNs with AAV-negative (blue) or with AAV-FlpO-positive (magenta) in *Scn2a<sup>gt/gt</sup>* (HOM) mice were obtained at a fixed membrane potential of -80 mV. A series of 400-ms hyperpolarizing and depolarizing steps in 50-pA increments were applied to produce the traces. Inset: representative trace in response to +350 pA current injection.

(B) The average number of APs generated in response to depolarizing current pulses. Unpaired two-tailed non-parametric Mann-Whitney *U*-test for each current pulse: \**p* < 0.05.

(C*i*) Representative traces in response to 100 pA negative current injection.  $V_{\text{steady-state}}$  ( $V_{\text{ss}}$ ) is the voltage recorded at 0-10 ms before the end of the stimulus.

(C*ii*) Individuals and average input resistance values at -80 mV. Unpaired two-tailed Student's *t*-test: \**p* < 0.05.

(D) Typical spikes of MSNs with AAV-negative (blue) or AAV-FlpO-positive (magenta) in HOM mice were obtained at a fixed membrane potential of -80 mV.

(E) Associated phase-plane plots at -80 mV.

(F-J) Individuals and average spike rheobase, voltage threshold, amplitude, AHP, and half-width values. Unpaired two-tailed Student's *t*-test: ns, no significance, *p* > 0.05; \**p* < 0.05; \*\**p* < 0.01. Data were shown as mean ± SEM.

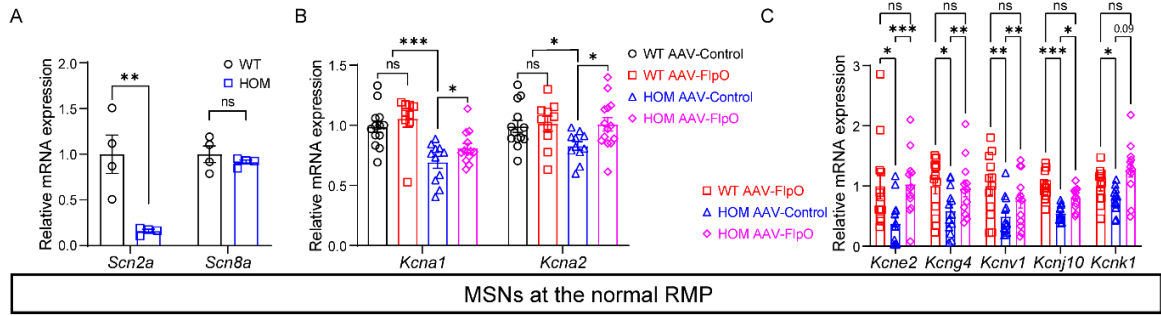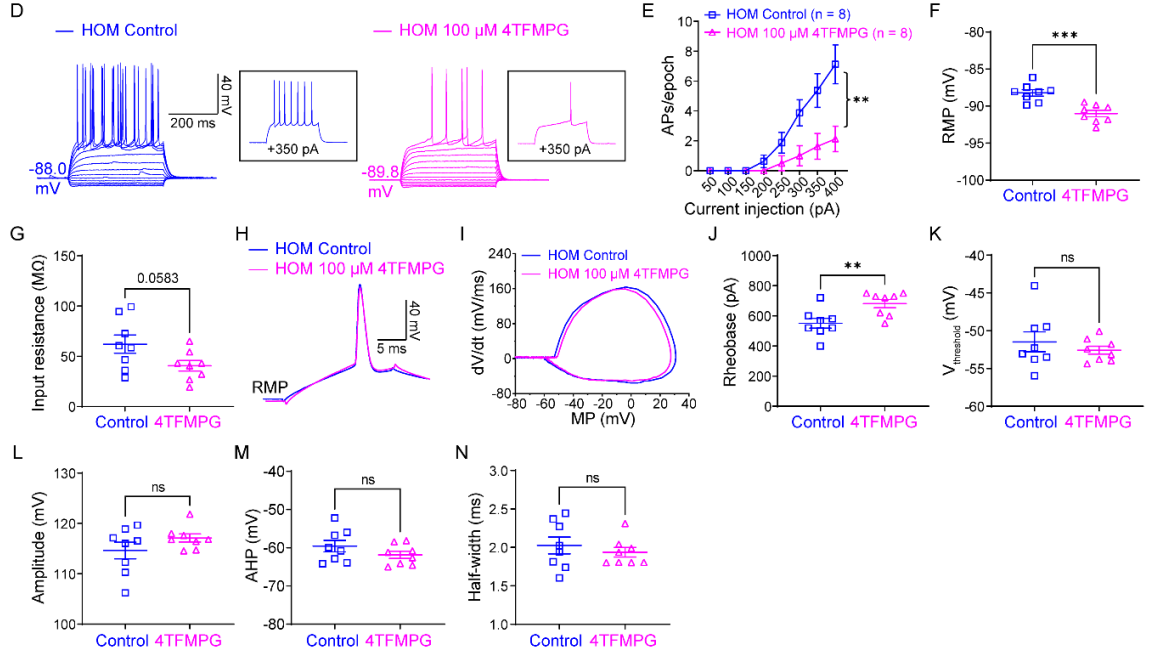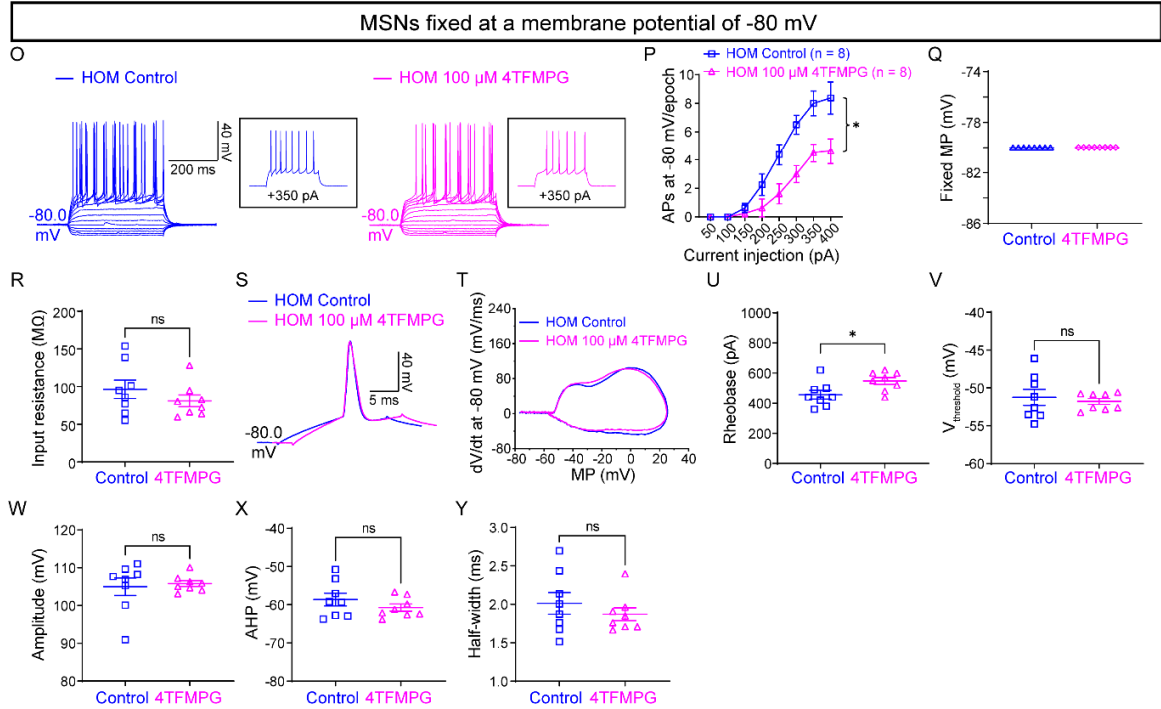

**Figure S4. Specific activation of K<sub>v</sub>1.1 channel by 4TFMPG reverses the elevated neuronal firings in adult Nav<sub>1.2</sub>-deficient mice. Related to Figure 4.**

(A) Quantitative (q)PCR analysis of *Scn2a* and *Scn8a* mRNA in the striatum samples from WT and *Scn2a<sup>gt/gt</sup>* mice. Unpaired two-tailed Student's *t*-test for each group: ns, no significance,  $p > 0.05$ ; \*\* $p < 0.01$ .

(B) qPCR analysis of *Kcna1* and *Kcna2* mRNA in the striatum samples from WT and HOM mice transduced with AAV-Control or AAV-FlpO, showing that the downregulated mRNA levels of K<sub>v</sub>1.1 and K<sub>v</sub>1.2 were partially reversible by FlpO-mediated restoration of Nav<sub>1.2</sub> expression in adult Nav<sub>1.2</sub>-deficient mice. Unpaired two-tailed Student's *t*-test: ns, no significance,  $p > 0.05$ ; \* $p < 0.05$ ; \*\*\* $p < 0.001$ .

(C) qPCR analysis of *Kcne2*, *Kcng4*, *Kcnv1*, *Kcnj10*, and *Kcnk1* mRNA in the striatum samples from WT and HOM mice transduced with AAV-Control or AAV-FlpO, showing that the downregulated mRNA levels of *Kcne2*, *Kcng4*, *Kcnv1*, *Kcnj10*, and *Kcnk1* were partially reversible by FlpO-mediated restoration of Nav<sub>1.2</sub> expression in adult Nav<sub>1.2</sub>-deficient mice. Unpaired two-tailed Student's *t*-test: ns, no significance,  $p > 0.05$ ; \* $p < 0.05$ ; \*\* $p < 0.01$ ; \*\*\* $p < 0.001$ .

(D) Representative current-clamp recordings of MSNs from HOM slices perfused with aCSF (HOM Control, blue) and HOM slices perfused with aCSF containing 4TFMPG (HOM 100  $\mu$ M 4TFMPG, magenta) at the RMP. A series of 400-ms hyperpolarizing and depolarizing steps in 50-pA increments were applied to produce the traces. Inset: representative trace in response to +350 pA current injection.

(E) The average number of APs generated in response to depolarizing current pulses at the RMP. Unpaired two-tailed non-parametric Mann-Whitney *U*-test for each current pulse: \*\* $p < 0.01$ .

(F) Individuals and average spike RMP values. Unpaired two-tailed Student's *t*-test: \*\*\* $p < 0.001$ .

(G) Individuals and average input resistance values at the RMP. Unpaired *t*-test.

(H) Typical spikes of MSNs from HOM slices perfused with aCSF (HOM Control, blue) and HOM slices perfused with aCSF containing 4TFMPG (HOM 100  $\mu$ M 4TFMPG, magenta) were obtained at the RMP.

(I) Associated phase-plane plots.

(J-N) Individuals and average AP rheobase, voltage threshold, amplitude, AHP, and half-width values.

(O) Representative current-clamp recordings of MSNs from HOM slices perfused with aCSF (HOM Control, blue) and HOM slices perfused with aCSF containing 4TFMPG (HOM 100  $\mu$ M 4TFMPG, magenta) at a fixed membrane potential of -80 mV. A series of 400-ms hyperpolarizing and depolarizing steps in 50-pA increments were applied to produce the traces. Inset: representative trace in response to +350 pA current injection.

(P) The average number of APs generated in response to depolarizing current pulses at -80 mV. Unpaired two-tailed non-parametric Mann-Whitney *U*-test for each current pulse: \* $p < 0.05$ .

(Q) Fixed MP values for recording.

(R) Individuals and average input resistance values at -80 mV. Unpaired two-tailed Student's *t*-test: ns, no significance,  $p > 0.05$ .

(S) Typical spikes of MSNs from *Scn2a<sup>gt/gt</sup>* slices perfused with aCSF (HOM Control, blue) and *Scn2a<sup>gt/gt</sup>* slices perfused with aCSF containing 4TFMPG (HOM 100  $\mu$ M 4TFMPG, magenta) were obtained at a fixed membrane potential of -80 mV.

(T) Associated phase-plane plots.

(U-Y) Individuals and average AP rheobase, voltage threshold, amplitude, AHP, and half-width values. Unpaired two-tailed Student's *t*-test: ns, no significance,  $p > 0.05$ ; \* $p < 0.05$ . Data were shown as mean  $\pm$  SEM.



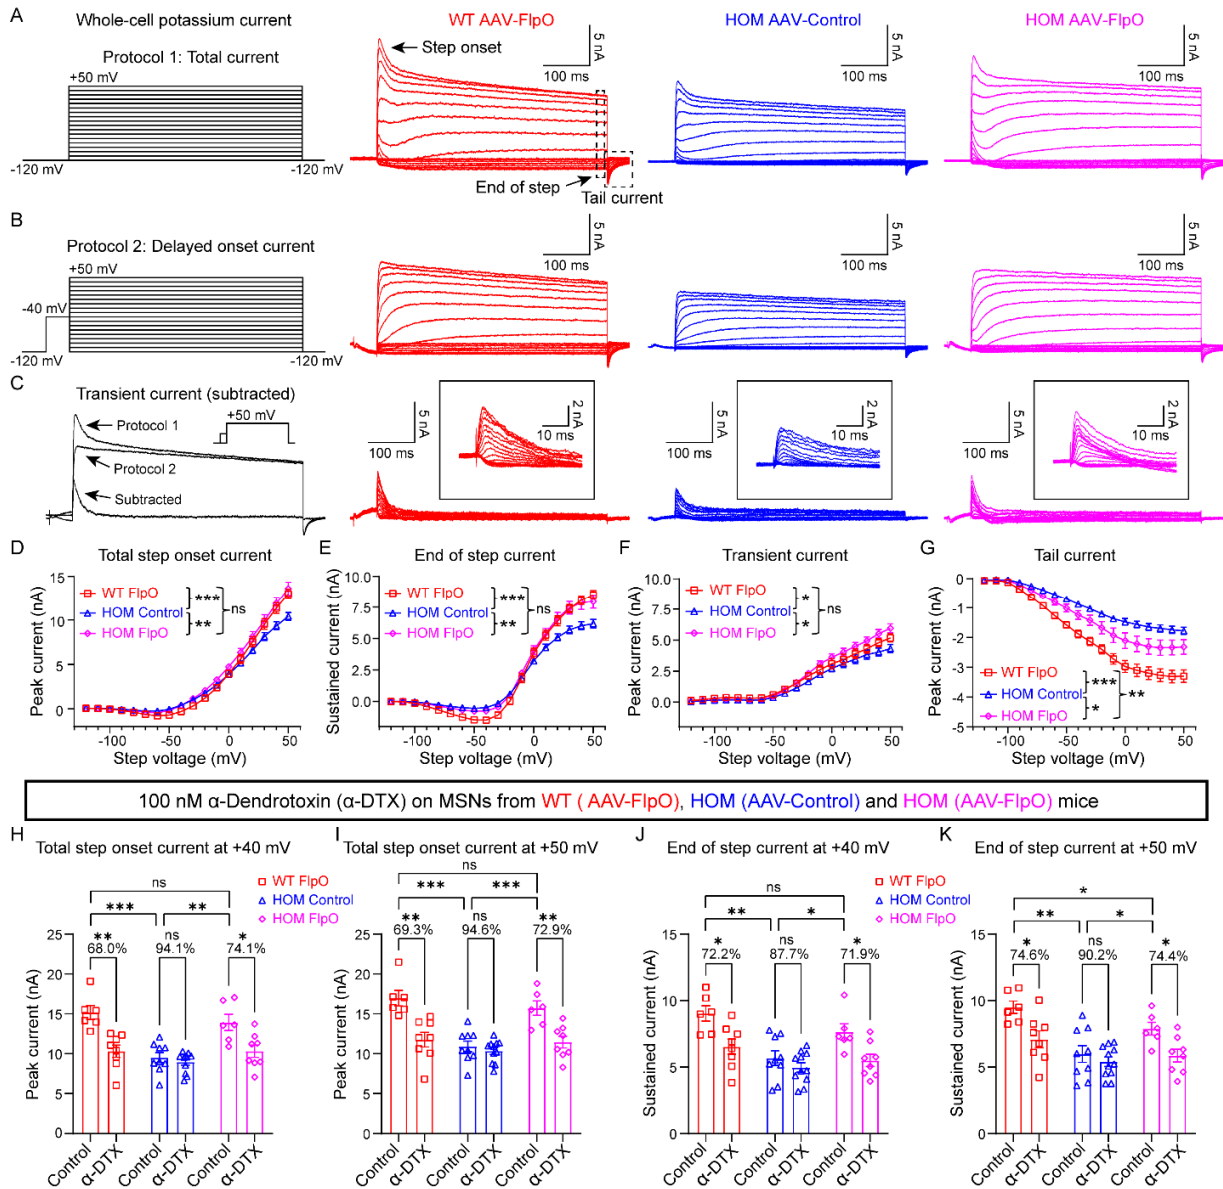

**Figure S5. Reduced potassium currents in striatal MSNs are reversible by AAV-FlpO-mediated rescue in adult Nav1.2-deficient mice. Related to Figure 4.**

(A-C) Representative whole-cell potassium currents of MSNs in slices from WT mice transduced with AAV-FlpO (red), HOM mice transduced with AAV-Control (blue), and HOM mice transduced with AAV-FlpO (magenta). Voltage steps were from -120 mV to +50 mV. Total currents were obtained from 500-ms steps followed by 100-ms pulse back to -120 mV. Step onset, end of step, and tail are shown. Delayed onset currents were measured following 50-ms prepulse to -40 mV. Transient currents were calculated by subtracting delayed onset currents from the total currents. Voltage-gated  $\text{Ca}^{2+}$  channels were not blocked to allow for activation of  $\text{Ca}^{2+}$ -dependent  $\text{K}^+$  channels.

(D-G) Summary for total step onset current, end of step current, transient current, and tail current, respectively.  $n = 17$  neurons in the group of WT mice transduced with AAV-FlpO (red),  $n = 23$

neurons in the group of HOM mice transduced with AAV-Control (blue), and  $n = 15$  neurons in the group of HOM mice transduced with AAV-FlpO (magenta). Two-way ANOVA with repeated measures: ns, no significance,  $p > 0.05$ ; \* $p < 0.05$ ; \*\* $p < 0.01$ ; \*\*\* $p < 0.001$ .

**(H-K)** 100 nM  $\alpha$ -Dendrotoxin ( $\alpha$ -DTX, blocker of  $K_{V1}$ ) reduces ~30% whole-cell total potassium currents of MSNs in slices from WT mice transduced with AAV-FlpO (red), ~10% total currents from HOM mice transduced with AAV-Control (blue), and ~30% total currents from HOM mice transduced with AAV-Control (magenta). Summaries for total step onset currents (**H**, at +40 mV; **I**, at +50 mV) and end of step current (**J**, at +40 mV; **K**, at +50 mV) were shown respectively. Values are the percentage for peak currents recorded in slices perfused 100 nM  $\alpha$ -DTX compared to each corresponding control group. Two-way ANOVA with repeated measures: ns, no significance,  $p > 0.05$ ; \* $p < 0.05$ ; \*\* $p < 0.01$ ; \*\*\* $p < 0.001$ . Data were shown as mean  $\pm$  SEM.

**Table S1. Oligonucleotides used in this study. Related to STAR Methods.**

| REAGENT or RESOURCE                                                  | SOURCE                                                                                        | IDENTIFIER                    |
|----------------------------------------------------------------------|-----------------------------------------------------------------------------------------------|-------------------------------|
| Oligonucleotides                                                     |                                                                                               |                               |
| <i>Scn2a</i> -Forward Sequence (5' -> 3')<br>ATTTTCGGCTCATTCTTCACACT | <a href="https://pga.mgh.harvard.edu/primerbank/">https://pga.mgh.harvard.edu/primerbank/</a> | PrimerBank ID:<br>ID840654a1  |
| <i>Scn2a</i> -Reverse Sequence (5' -> 3')<br>GGGCGAGGTATCGGTTTTTGT   | <a href="https://pga.mgh.harvard.edu/primerbank/">https://pga.mgh.harvard.edu/primerbank/</a> | PrimerBank ID:<br>840654a1    |
| <i>Scn8a</i> -Forward Sequence (5' -> 3')<br>GCAAGCTCAAGAAACCACCC    | <a href="https://pga.mgh.harvard.edu/primerbank/">https://pga.mgh.harvard.edu/primerbank/</a> | PrimerBank ID:<br>951126a1    |
| <i>Scn8a</i> -Reverse Sequence (5' -> 3')<br>CCGTAGATGAAAGGCAAACCTCT | <a href="https://pga.mgh.harvard.edu/primerbank/">https://pga.mgh.harvard.edu/primerbank/</a> | PrimerBank ID:<br>951126a1    |
| <i>Kcna1</i> -Forward Sequence (5' -> 3')<br>CCCTACCCGAGAAGGAGTACC   | <a href="https://pga.mgh.harvard.edu/primerbank/">https://pga.mgh.harvard.edu/primerbank/</a> | PrimerBank ID:<br>119395751c2 |
| <i>Kcna1</i> -Reverse Sequence (5' -> 3')<br>GGATGACCATGACCGACACAA   | <a href="https://pga.mgh.harvard.edu/primerbank/">https://pga.mgh.harvard.edu/primerbank/</a> | PrimerBank ID:<br>119395751c2 |
| <i>Kcna2</i> -Forward Sequence (5' -> 3')<br>GCACCCACAAGACACCTATGA   | <a href="https://pga.mgh.harvard.edu/primerbank/">https://pga.mgh.harvard.edu/primerbank/</a> | PrimerBank ID:<br>31543024a1  |
| <i>Kcna2</i> -Reverse Sequence (5' -> 3')<br>GTCTCTGGGAAGTGGGCTAAG   | <a href="https://pga.mgh.harvard.edu/primerbank/">https://pga.mgh.harvard.edu/primerbank/</a> | PrimerBank ID:<br>31543024a1  |
| <i>Kcne2</i> -Forward Sequence (5' -> 3')<br>CACATTAGCCAATTTGACCCAGA | <a href="https://pga.mgh.harvard.edu/primerbank/">https://pga.mgh.harvard.edu/primerbank/</a> | PrimerBank ID:<br>19882205a1  |
| <i>Kcne2</i> -Reverse Sequence (5' -> 3')<br>GAACATGCCGATCATCACCAT   | <a href="https://pga.mgh.harvard.edu/primerbank/">https://pga.mgh.harvard.edu/primerbank/</a> | PrimerBank ID:<br>19882205a1  |
| <i>Kcng4</i> -Forward Sequence (5' -> 3')<br>CGCAGCCATGAGGAGATCAC    | <a href="https://pga.mgh.harvard.edu/primerbank/">https://pga.mgh.harvard.edu/primerbank/</a> | PrimerBank ID:<br>28076887a1  |
| <i>Kcng4</i> -Reverse Sequence (5' -> 3')<br>GCCAGGAAGCTCACGATCAC    | <a href="https://pga.mgh.harvard.edu/primerbank/">https://pga.mgh.harvard.edu/primerbank/</a> | PrimerBank ID:<br>28076887a1  |
| <i>Kcnv1</i> -Forward Sequence (5' -> 3')<br>ATTGCGCTCACTTGGGATGAC   | <a href="https://pga.mgh.harvard.edu/primerbank/">https://pga.mgh.harvard.edu/primerbank/</a> | PrimerBank ID:<br>28460685a1  |
| <i>Kcnv1</i> -Reverse Sequence (5' -> 3')<br>GTGAAGTTGTATCAGGAATGCT  | <a href="https://pga.mgh.harvard.edu/primerbank/">https://pga.mgh.harvard.edu/primerbank/</a> | PrimerBank ID:<br>28460685a1  |
| <i>Kcnj10</i> -Forward Sequence (5' -> 3')<br>ACCTCAAGGATCTATGGACGAC | <a href="https://pga.mgh.harvard.edu/primerbank/">https://pga.mgh.harvard.edu/primerbank/</a> | PrimerBank ID:<br>87116685c2  |
| <i>Kcnj10</i> -Reverse Sequence (5' -> 3')<br>AGCTACCAGATACCACACCAC  | <a href="https://pga.mgh.harvard.edu/primerbank/">https://pga.mgh.harvard.edu/primerbank/</a> | PrimerBank ID:<br>87116685c2  |
| <i>Kcnk1</i> -Forward Sequence (5' -> 3')<br>GAGGAGCTGCCTTATGAGGAC   | <a href="https://pga.mgh.harvard.edu/primerbank/">https://pga.mgh.harvard.edu/primerbank/</a> | PrimerBank ID:<br>6680538a1   |

|                                                                          |                                                                                                                                                                   |                             |
|--------------------------------------------------------------------------|-------------------------------------------------------------------------------------------------------------------------------------------------------------------|-----------------------------|
| <i>Kcnk1</i> -Reverse Sequence (5' -> 3')<br>TCCCAATTCCAATTTCCCGAG       | <a href="https://pga.mgh.harvard.edu/primerbank/">https://pga.mgh.harvard.edu/primerbank/</a>                                                                     | PrimerBank ID:<br>6680538a1 |
| <i>Actb</i> -Forward Sequence (5' -> 3')<br>GGCTGTATTCCCCTCCATCG         | <a href="https://pga.mgh.harvard.edu/primerbank/">https://pga.mgh.harvard.edu/primerbank/</a>                                                                     | PrimerBank ID:<br>6671509a1 |
| <i>Actb</i> -Reverse Sequence (5' -> 3')<br>GGCTGTATTCCCCTCCATCG         | <a href="https://pga.mgh.harvard.edu/primerbank/">https://pga.mgh.harvard.edu/primerbank/</a>                                                                     | PrimerBank ID:<br>6671509a1 |
| <i>Gapdh</i> -Forward Sequence (5' -> 3')<br>AGGTCGGTGTGAACGGATTTG       | <a href="https://pga.mgh.harvard.edu/primerbank/">https://pga.mgh.harvard.edu/primerbank/</a>                                                                     | PrimerBank ID:<br>6679937a1 |
| <i>Gapdh</i> -Reverse Sequence (5' -> 3')<br>TGTAGACCATGTAGTTGAGGTCA     | <a href="https://pga.mgh.harvard.edu/primerbank/">https://pga.mgh.harvard.edu/primerbank/</a>                                                                     | PrimerBank ID:<br>6679937a1 |
| <i>Scn2a1L</i> -Forward Sequence (5' -> 3')<br>GAGGCAAAGAATCTGTACTGTGGGG | <a href="https://www.nlac.narl.org.tw/RMRC/upload/deposit_file/201704241012510.pdf">https://www.nlac.narl.org.tw/RMRC/upload/deposit_file/201704241012510.pdf</a> | RMRC13300                   |
| <i>Scn2a1L</i> -Reverse Sequence (5' -> 3')<br>GACGCCTGTGAATAAAACCAAGGAA | <a href="https://www.nlac.narl.org.tw/RMRC/upload/deposit_file/201704241012510.pdf">https://www.nlac.narl.org.tw/RMRC/upload/deposit_file/201704241012510.pdf</a> | RMRC13300                   |
